# Supplementary material for: Reversible and irreversible conformational changes in poly(isocyanide)s: a remote stereoelectronic effect
Source: Royal Society of Chemistry journal article supplement (doi:10.1039/b411449c), 2004-12-08
Supplement: b411449c-esi.pdf [file b411449c-esi.pdf]

$^{13}\text{C}$  NMR spectrum of (*R*)-2 ( $\text{CDCl}_3$ )<sup>S1, S2</sup>

Full Range

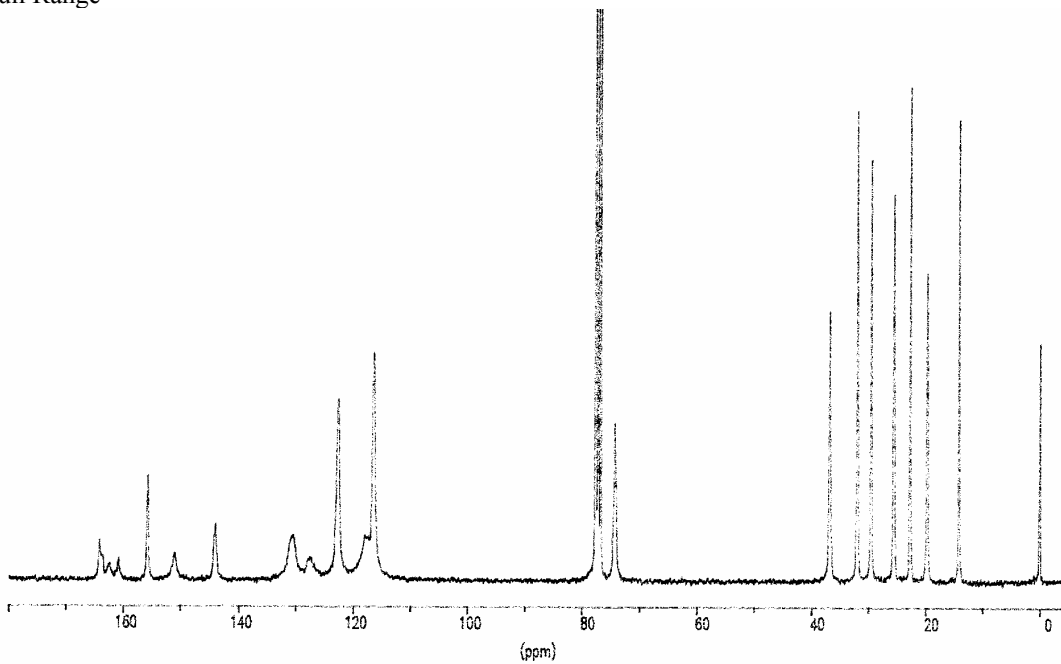

Enlargement of aromatic region of  $^{13}\text{C}$  NMR spectrum of (*R*)-2 ( $\text{CDCl}_3$ ) and assignment

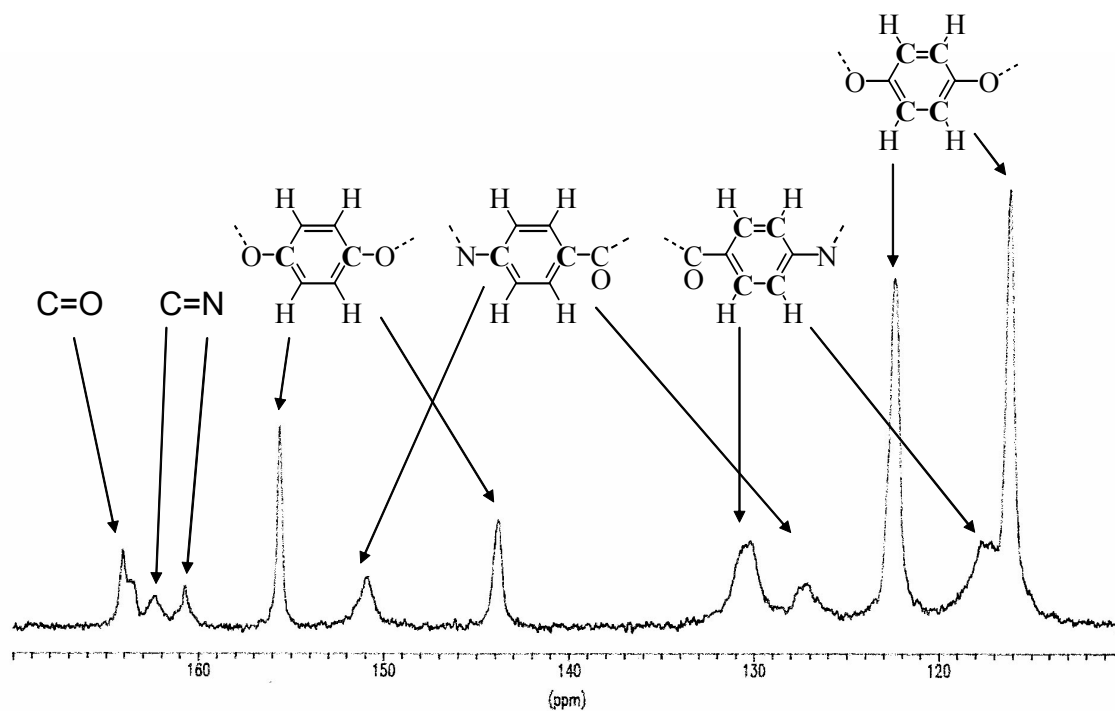

$^{13}\text{C}$  NMR spectrum of (*R*)-4 ( $\text{CDCl}_3$ )  
Full range

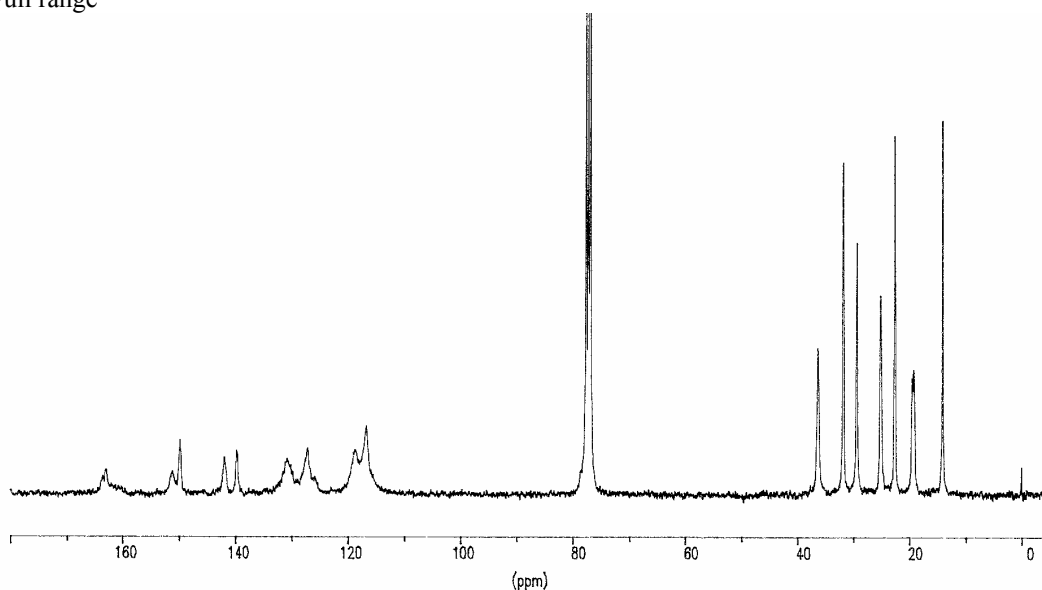

Enlargement of aromatic region of  $^{13}\text{C}$  NMR spectrum of (*R*)-4 ( $\text{CDCl}_3$ ) (for assignment see spectrum of (*R*)-2)

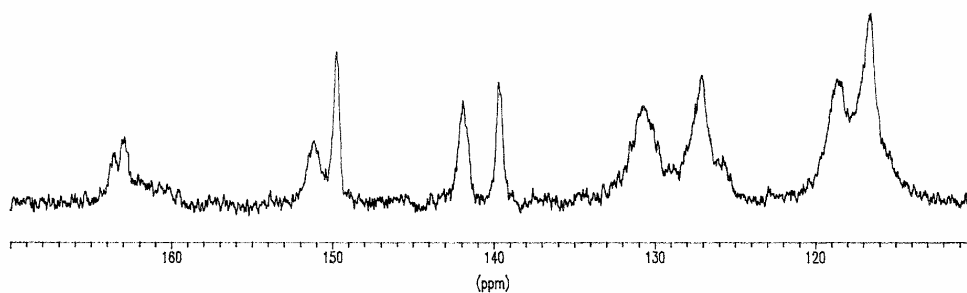

## Reference

- S1 The  $^{13}\text{C}$  NMR resonances of poly(isocyanide)s are generally very broad, see: (a) R.B. King and L. Borodinsky, *Macromolecules*, 1985, **18**, 2117-2120; (b) R.B. King and M.J. Greene, *J. Polym. Sci. A, Polym. Chem*, 1987, **25**, 907-918; (c) M.M. Green, R.A. Gross, F.C. Schilling, K. Zero and C. Crosby III, *Macromolecules*, 1988, **21**, 1839-1846; (d) M. Abdelkader, W. Drenth and E.W. Meijer, *Chem. Mater.* 1991, **3**, 598-602. (e) J.-T. Huang, J. Sun, W.B. Euler, W. Rosen, *J. Polym. Sci. A, Polym. Chem*, 1997, **35**, 439-446.
- S2 For a study of the  $^{13}\text{C}$  NMR of oligomeric species see: L. Spencer, M. Kim, W.B. Euler, and W. Rosen, *J. Am. Chem. Soc.* 1997, **119**, 8129-8130.
